# Supplementary material for: Dual Pharmacological Targeting of HDACs and PDE5 Inhibits Liver Disease Progression in a Mouse Model of Biliary Inflammation and Fibrosis
Source: MDPI journal article supplement (doi:10.3390/cancers12123748), 2020-12-13

**Figure 5a**

**LX2 cells**

**Ac-H3**

**H3K14Ac**

**H3**

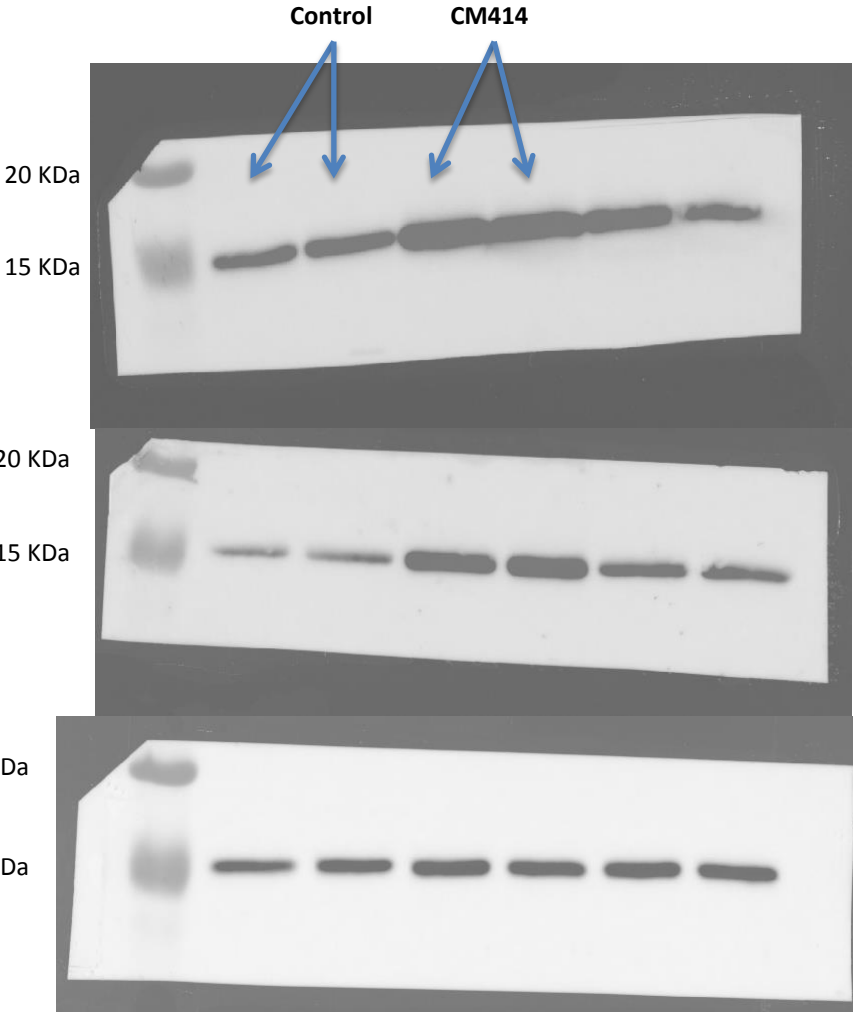

**H69 cells**

**Ac-H3**

**H3K14Ac**

**H3**

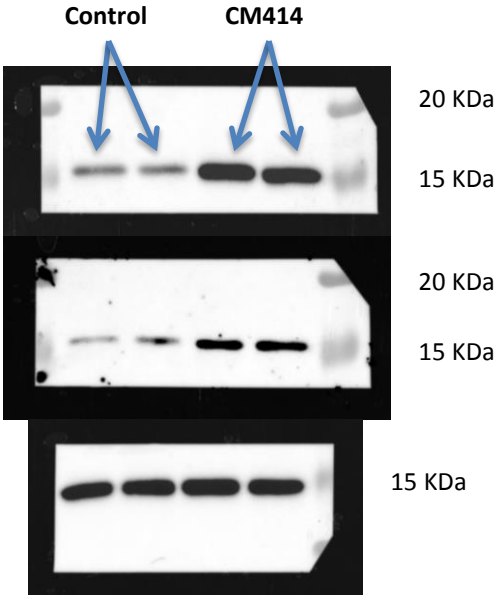

**Figure 5b**

**LX2 cells**

**Control**

**CM414**

50 KDa

37 KDa

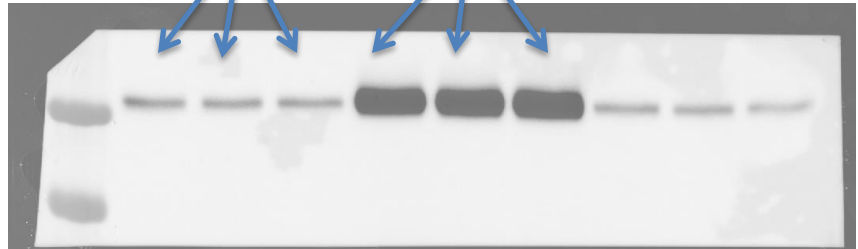

**Ac-α-TUBULIN**

50 KDa

37 KDa

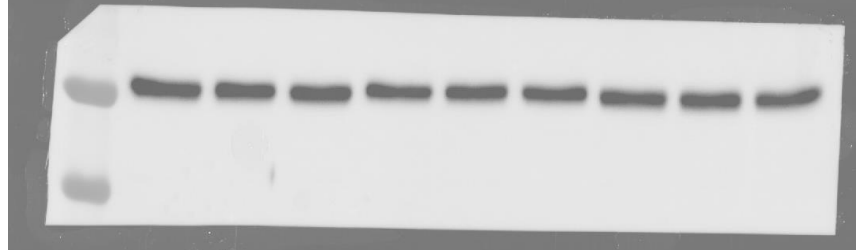

**α-TUBULIN**

**H69 cells**

**Control**

**CM414**

50 KDa

37 KDa

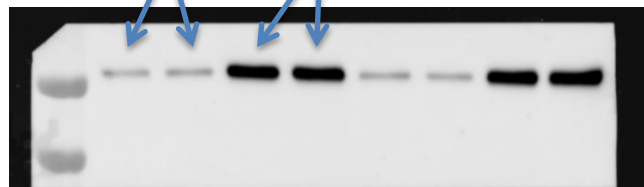

**Ac-α-TUBULIN**

50 KDa

37 KDa

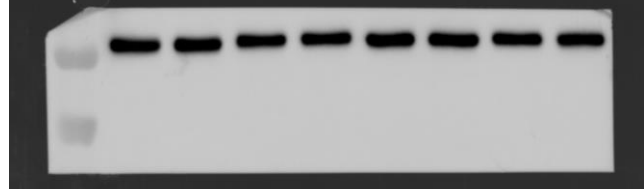

**α-TUBULIN**

**Figure 5c**

**LX2 cells**

**pVASP (S239)**

**VASP**

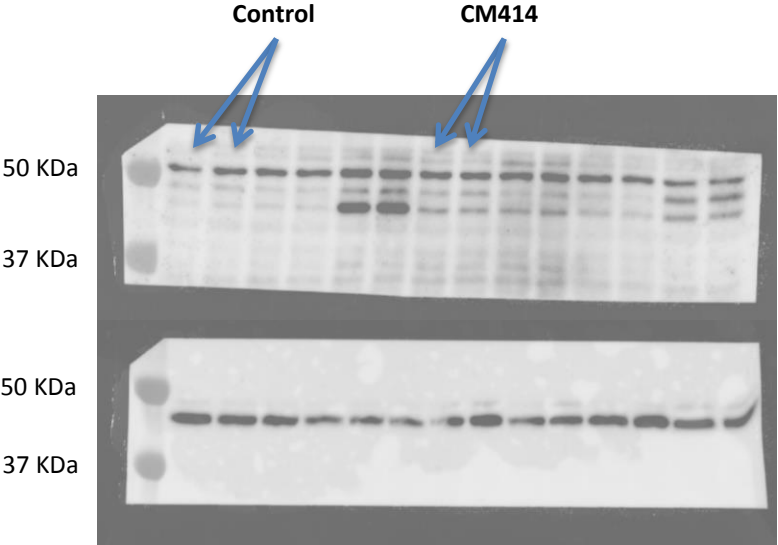

**H69 cells**

**pVASP (S239)**

**VASP**

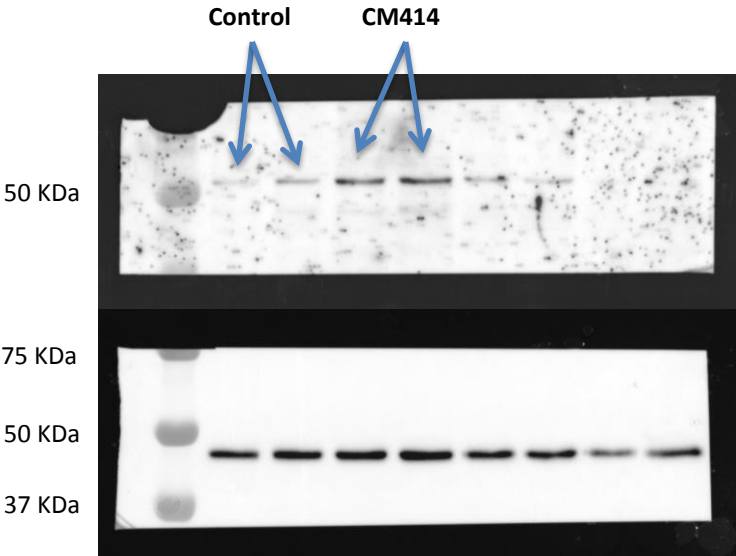

**Figure 6c**

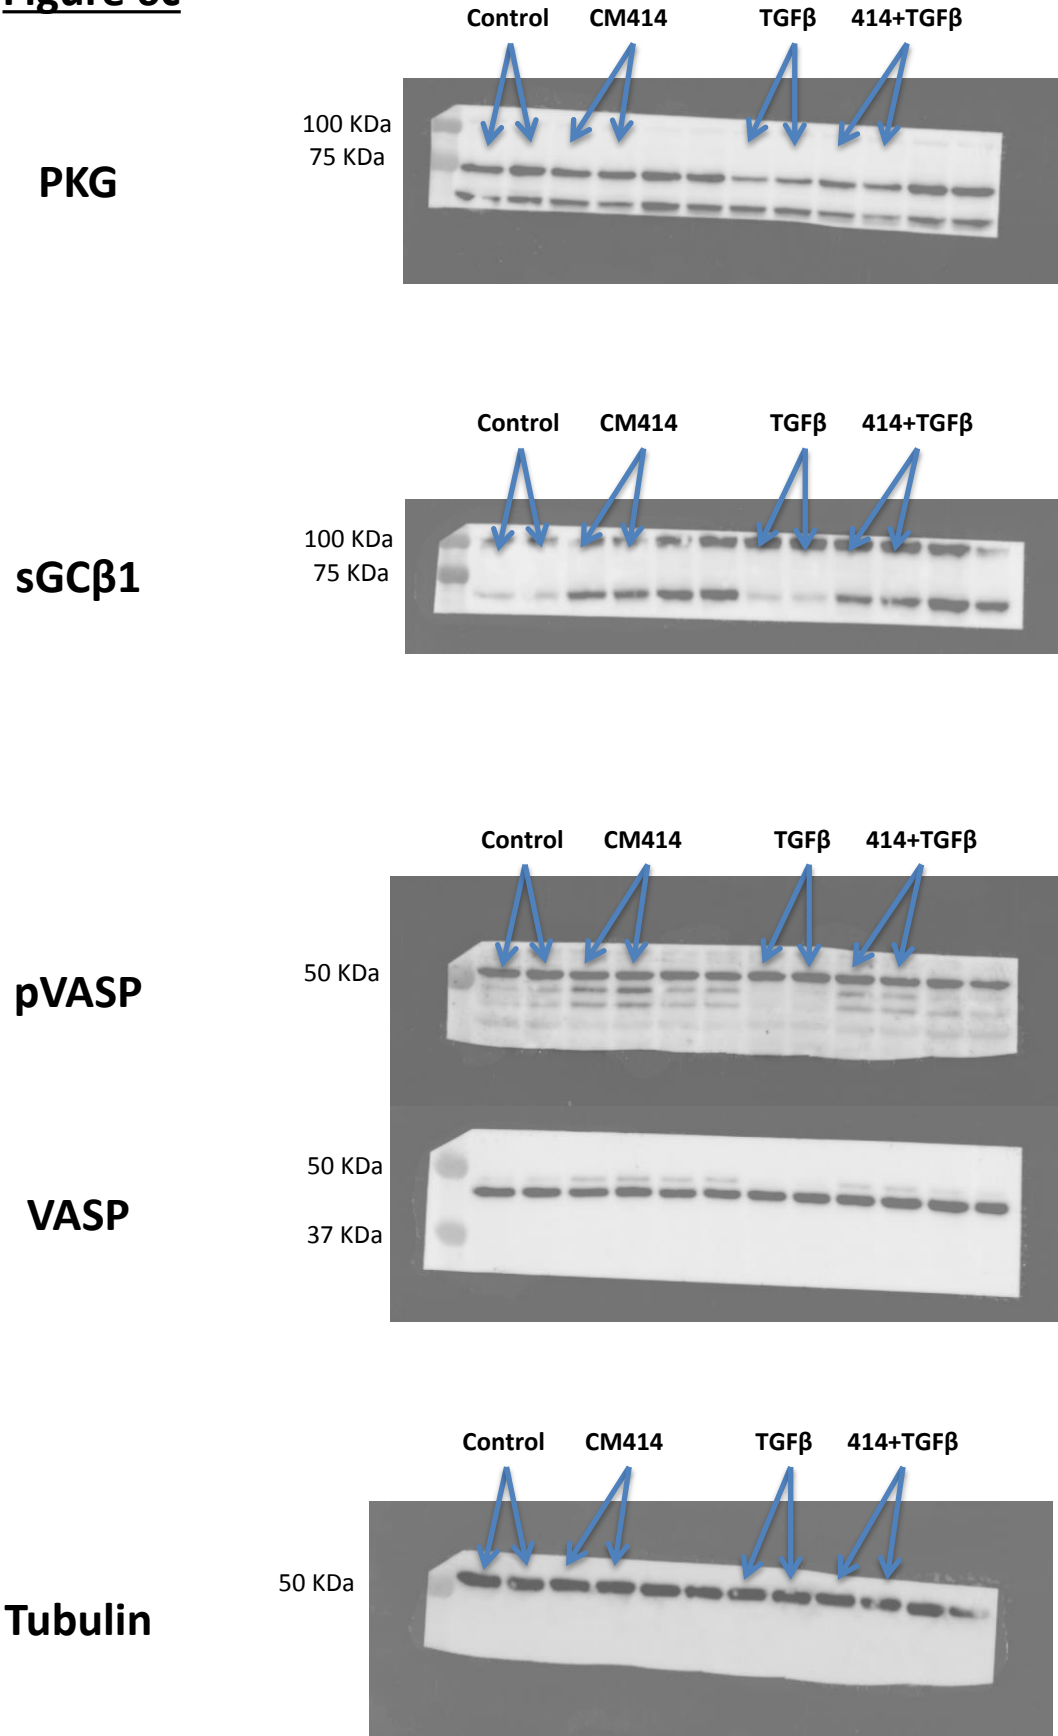

**Figure 6e**

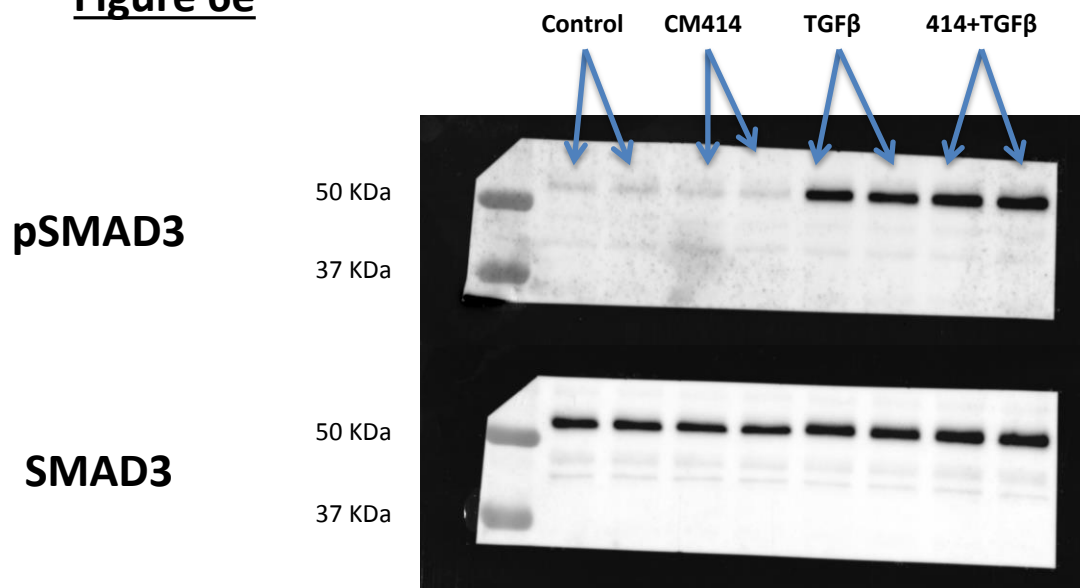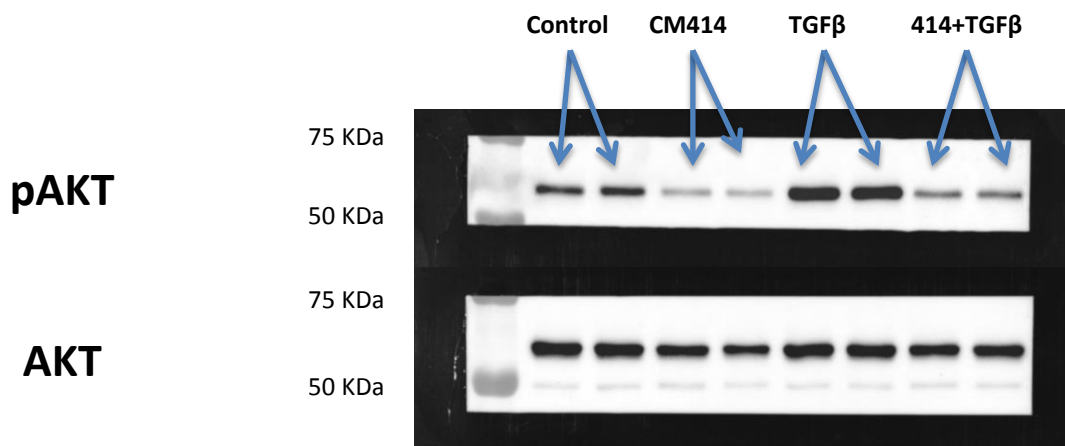

**Figure 6g**

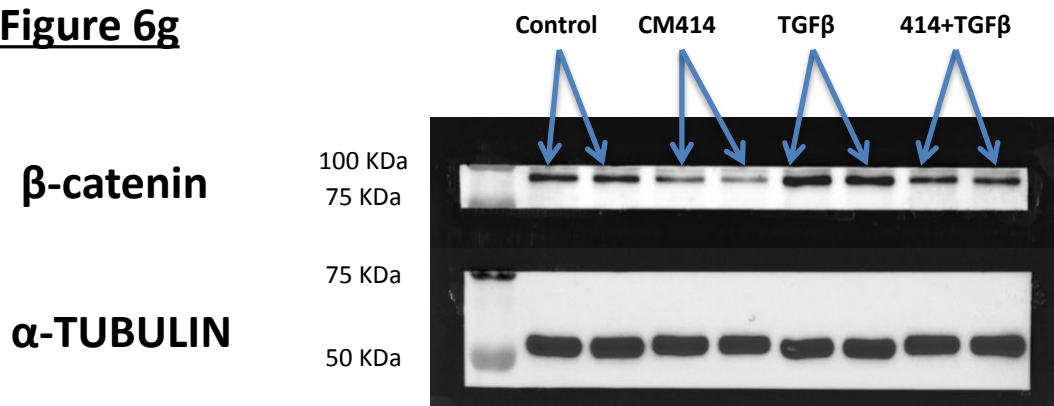

**Figure 7b**

**$\alpha$ -SMA**

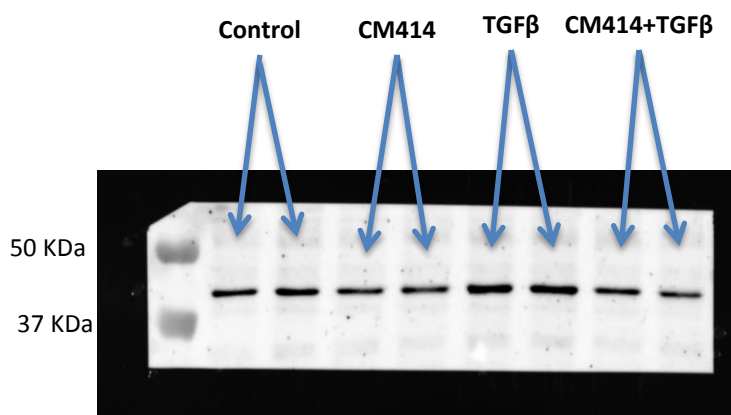

**Collagen-1**

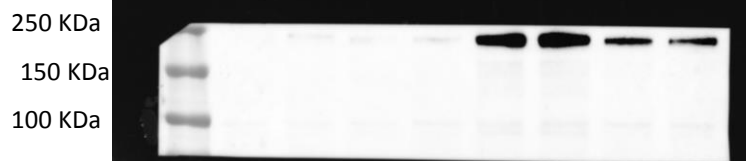

**$\alpha$ -TUBULIN**

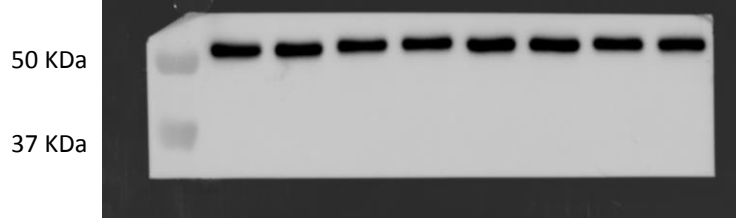

**Figure 7d**

**pSMAD3**

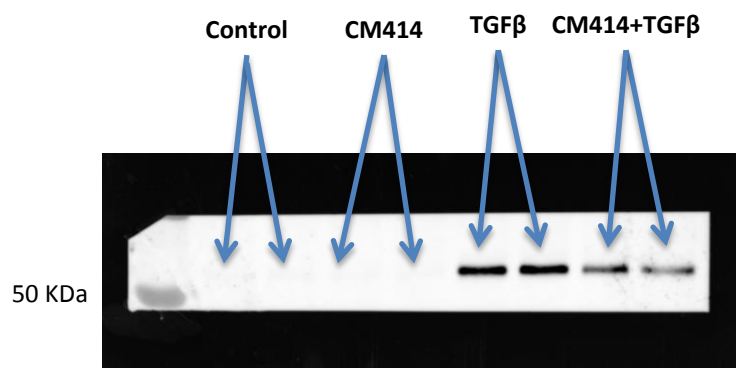

**SMAD3**

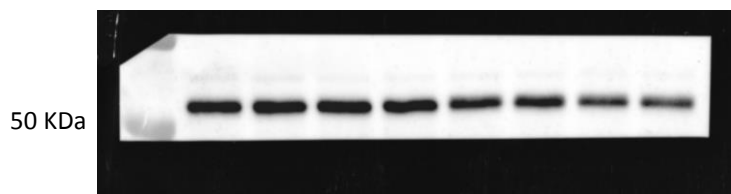

**Figure 7f**

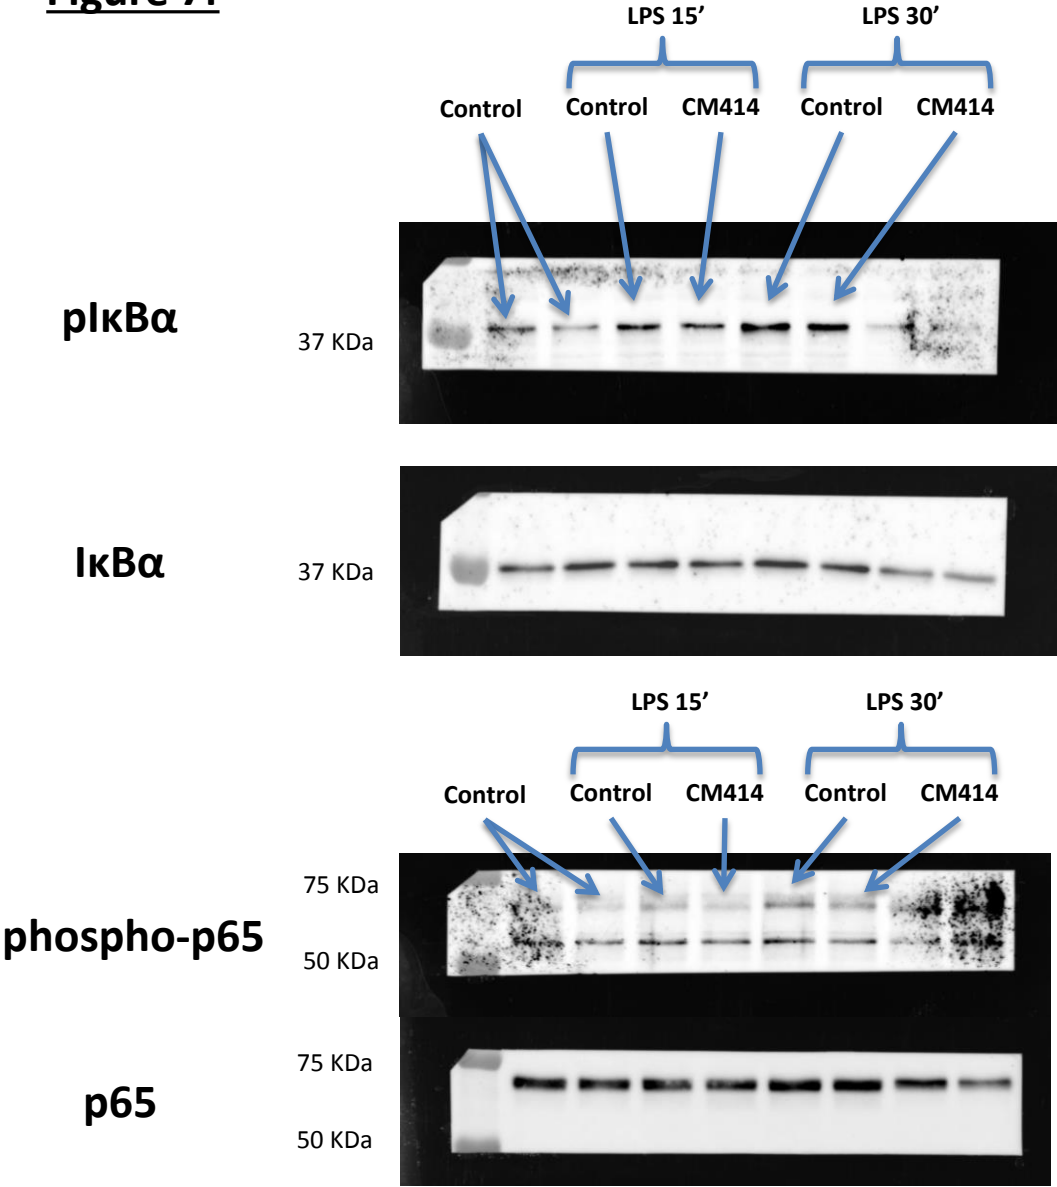

Supplement: s1 [file s1]
